# Supplementary material for: Gauging the importance of structural parameters for hyperfine coupling constants in organic radicals
Source: Royal Society of Chemistry journal article supplement (doi:10.1039/d3ra02476h), 2023-01-01
Supplement: d3ra02476h1.pdf [file d3ra02476h1.pdf]

## Electronic Supporting Information

to

### Gauging the importance of structural parameters for hyperfine coupling constants in organic radicals

*Conrad Szczuka*<sup>a\*</sup>, *Rüdiger-A. Eichel*<sup>a,b</sup>, *Josef Granwehr*<sup>a,c</sup>

<sup>a</sup> Institute of Energy and Climate Research (IEK-9), Forschungszentrum Jülich GmbH, 52425 Jülich, Germany

<sup>b</sup> Institute of Physical Chemistry, RWTH Aachen University, 52056 Aachen, Germany

<sup>c</sup> Institute of Technical and Macromolecular Chemistry, RWTH Aachen University, 52056 Aachen, Germany

#### Table of contents

|     |                                                                  |    |
|-----|------------------------------------------------------------------|----|
| (A) | Parameter choice and optimization .....                          | 2  |
| (B) | Selected importance matrices for $A_{x,y,z}$ .....               | 5  |
| (C) | Structure and importance matrix of tyrosyl radical .....         | 6  |
| (D) | Structure and importance matrix of tryptophan-type radical ..... | 7  |
| (E) | Importance matrices with alternative $\lambda$ values .....      | 8  |
| (F) | Example ORCA input files .....                                   | 12 |

## (A) Parameter choice and optimization

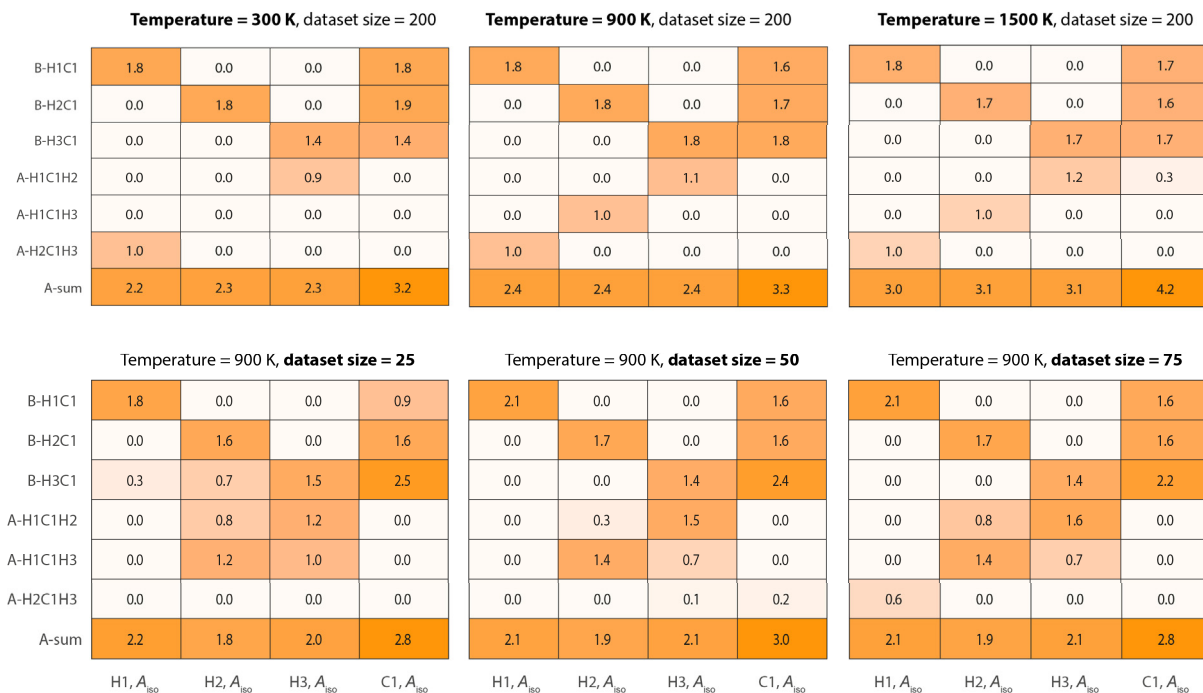

**Figure S1.** Methyl radical importance matrices. The temperature denotes the molecular dynamics simulation temperature; the dataset size denotes the number of hyperfine calculations, which are performed using snapshots in random steps of 0.5 – 40 fs along the molecular dynamics trajectory. (upper panel) Qualitatively, the importance matrices closely resemble each other. With constant dataset size, especially angle-dependent correlations are more consistent with the symmetry of the molecule at higher temperatures. Comparison of the matrices shows that the ratio of importance values (here, particularly those between bond-related and angle-related) might be changing slightly. (lower panel) Matrices resemble the minimum-error dataset as shown in the main text. Remaining correlations that do not appear for a dataset size of 505 exhibit already comparably small feature weights for a dataset size of 25.

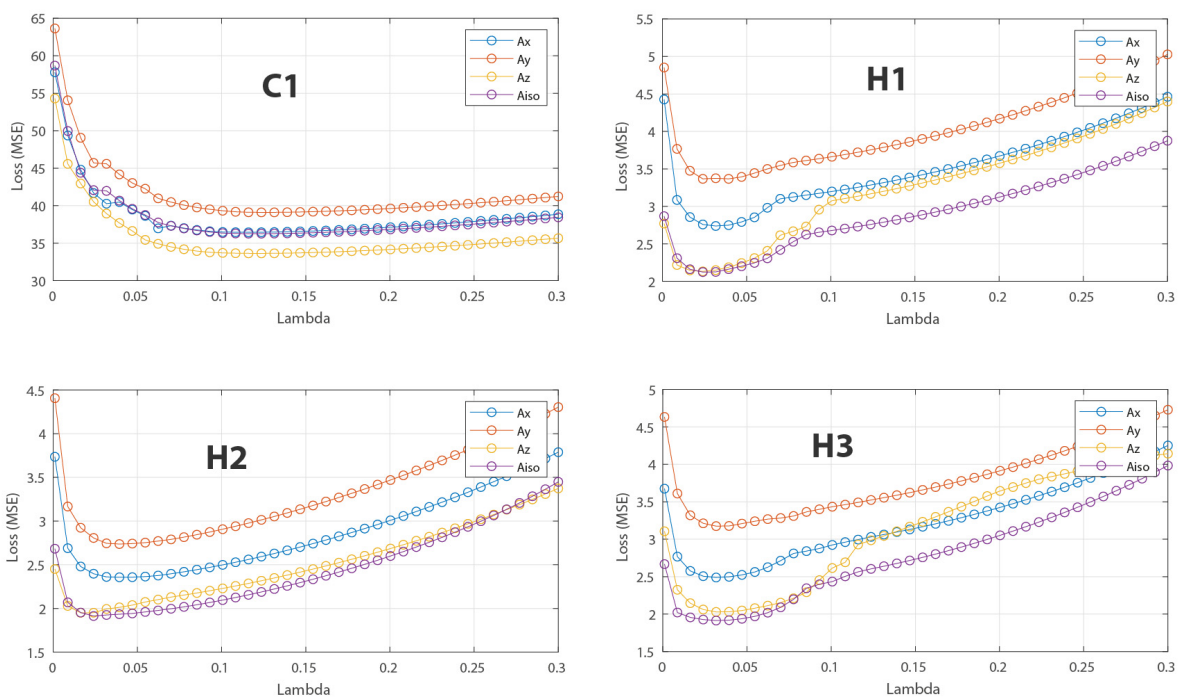

**Figure S2.** Regularization parameter  $\lambda$  optimization for the methyl radical.  $\lambda$  is plotted against the mean square error (MSE) of the neighborhood components analysis objective function, denoted as loss function in machine learning. The loss function is given by the error estimation between the real outputs and the model. The objective function for minimization is the sum of this loss function and the penalizing regularization term with squared feature weights and the regularization parameter  $\lambda$ . Hyperfine coupling parameter are separately optimized; due to their similarity, their average is computed and given in Supporting Table 1 for each magnetic nucleus.

**Table S1.** Overview of computational costs for the methyl and semiquinone radicals. The values are extracted from the ORCA output files. Calculation durations reflect the required usage time on the cluster, which includes computational overheads when parallelization is used. The molecular dynamics simulation is the computational bottleneck.

|                                    | Methyl radical        |                    |                     | semiquinone radical   |                    |                     |
|------------------------------------|-----------------------|--------------------|---------------------|-----------------------|--------------------|---------------------|
|                                    | geometry optimization | molecular dynamics | hyperfine constants | geometry optimization | molecular dynamics | hyperfine constants |
| calculation duration (hours)       | 0.01                  | 46                 | 0.006               | 0.1                   | 384                | 0.05                |
| number of cores                    | 4                     | 4                  | 4                   | 8                     | 32                 | 4                   |
| number of calculations             | 1                     | 1                  | 505                 | 1                     | 1                  | 1496                |
| total computation time (core days) | 0.04                  | 184                | 12.12               | 0.8                   | 12288              | 299.2               |
| computation time (%)               | 0.020                 | 93.8               | 6.2                 | 0.006                 | 97.6               | 2.4                 |

**Table S2.** Optimized regularization parameters  $\lambda$  for the methyl, ethyl, and methyl peroxy radicals. Magnetically equivalent nuclei are grouped with asterisks. The overall average and mean  $\lambda$  values are used to estimate a reasonable value for all importance matrices. Furthermore, hyperfine coupling constants of the geometry optimized structures are given. For comparison of the computed values, the reader is referred to the following reference: DOI: 10.1080/00268970701604655.

| Radical       | Nucleus | optimized $\lambda$ | $A_x$ | $A_y$ | $A_z$  | $A_{iso}$ |
|---------------|---------|---------------------|-------|-------|--------|-----------|
| methyl        | C1      | 0.12                | 41.1  | 41.6  | 280.3  | 121.0     |
|               | H1*     | 0.03                | -23.9 | -62.3 | -95.2  | -60.5     |
|               | H2*     | 0.03                | -20.4 | -58.6 | -96.3  | -58.4     |
|               | H3*     | 0.03                | -19.2 | -57.1 | -97.6  | -57.9     |
| ethyl         | C1      | 0.04                | 2.9   | 3.8   | 241.5  | 82.7      |
|               | C2      | 0.03                | -31.9 | -32.1 | -36.2  | -33.4     |
|               | H1*     | 0.02                | -28.3 | -63.6 | -105.1 | -65.7     |
|               | H2*     | 0.02                | -25.8 | -62.0 | -102.2 | -63.3     |
|               | H3**    | 0.21                | -0.7  | -1.8  | 11.5   | 3.0       |
|               | H4**    | 0.21                | 115.2 | 116.8 | 130.2  | 120.7     |
|               | H5**    | 0.26                | 115.3 | 116.9 | 130.3  | 120.8     |
| methyl peroxy | C1      | 0.01                | -11.8 | -15.7 | -16.4  | -14.6     |
|               | H1*     | 0.04                | -5.5  | -6.3  | 6.4    | -1.8      |
|               | H2*     | 0.05                | 20.3  | 21.5  | 35.1   | 25.6      |
|               | H3*     | 0.04                | 26.7  | 27.7  | 40.8   | 31.7      |
|               | O1      | 0.01                | 23.1  | 28.9  | -158.2 | -35.4     |
|               | O2      | 0.01                | 66.0  | 68.6  | -273.3 | -46.3     |
|               | average |                     | 0.07  |       |        |           |
| median        |         | 0.03                |       |       |        |           |

(B) Selected importance matrices for  $A_{x,y,z}$

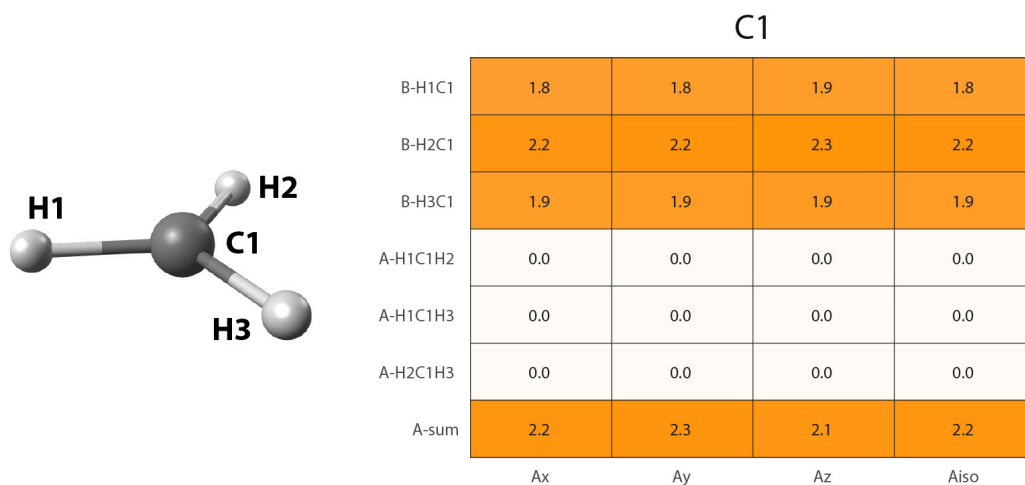

Figure S3. Methyl radical importance matrix for all hyperfine tensor principal components of C1 using neighborhood components analysis with  $\lambda = 0.05$ . The molecular structure is plotted to the left.

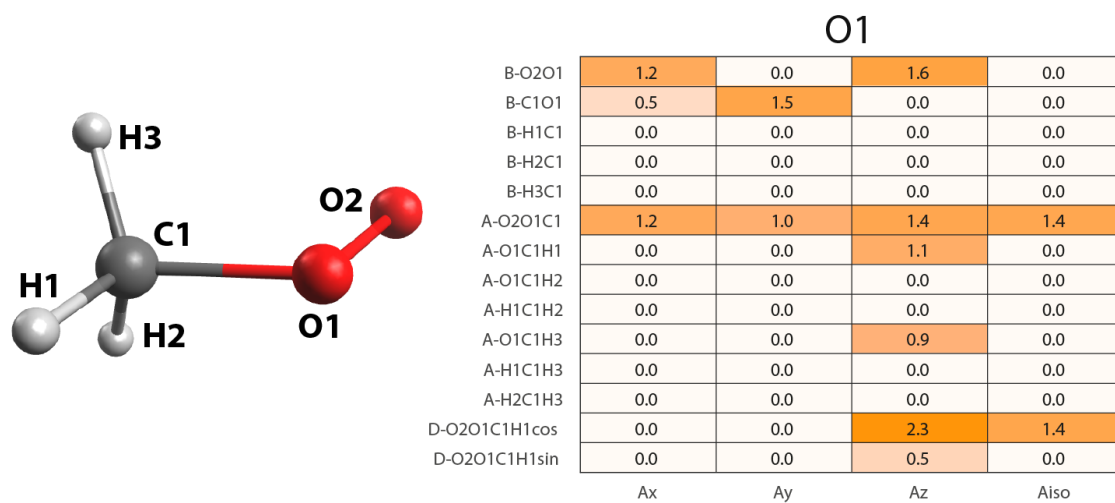

Figure S4. Methyl peroxy radical importance matrix for all hyperfine tensor principal components of O1 using neighborhood components analysis with  $\lambda = 0.05$ . The molecular structure is plotted to the left.

(C) Structure and importance matrix of tyrosyl radical

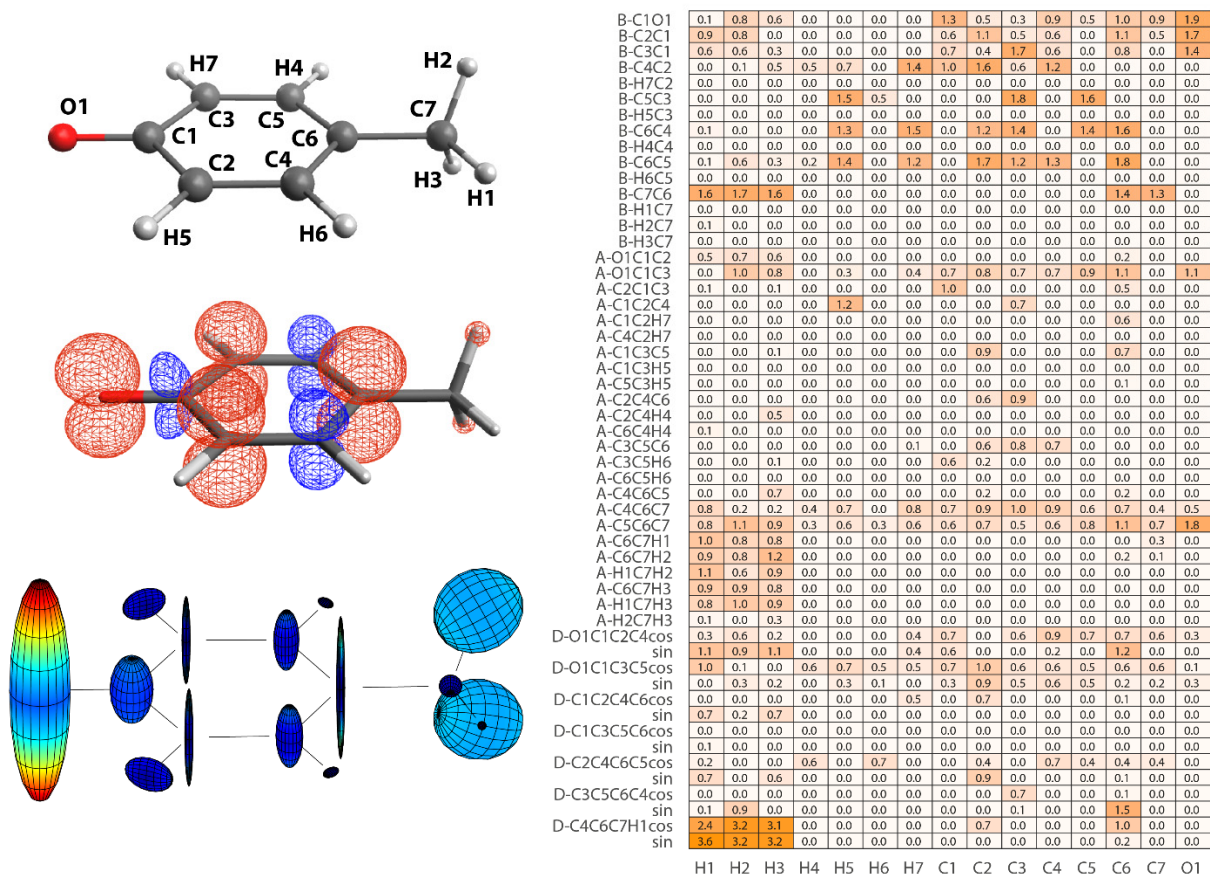

**Figure S5.** Structure–hyperfine relationships for the tyrosyl radical. (left) Atomic labels, spin densities, and hyperfine coupling tensor visualizations are plotted in analogy to Figure 2. (right) Importance matrix is given for  $A_{iso}$  values correlated with bonds (B), angles (A), and dihedrals (D). For dihedrals, importance values for cosine (cos) and sine (sin) values are given.

(D) Structure and importance matrix of tryptophan-type radical

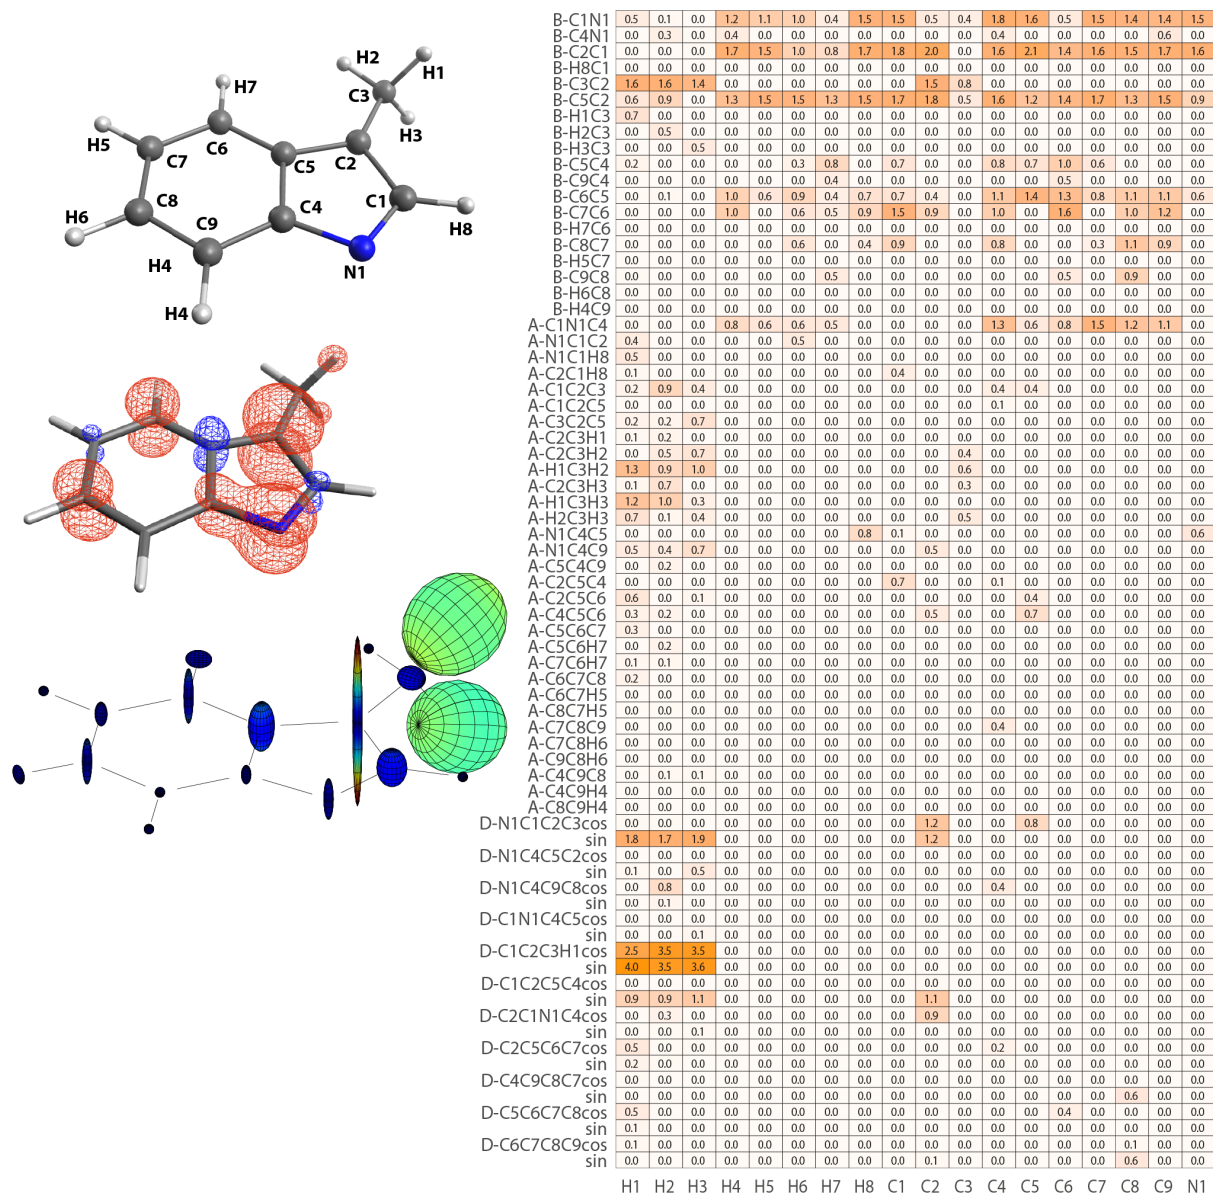

### (E) Importance matrices with alternative $\lambda$ values

|          | $\lambda = 0.025$      |     |     |     | $\lambda = 0.100$      |     |     |     |
|----------|------------------------|-----|-----|-----|------------------------|-----|-----|-----|
|          | CH <sub>3</sub> , Aiso |     |     |     | CH <sub>3</sub> , Aiso |     |     |     |
| B-H1C1   | 2.3                    | 0.0 | 0.0 | 2.1 | 1.6                    | 0.0 | 0.0 | 1.6 |
| B-H2C1   | 0.0                    | 2.5 | 0.7 | 2.7 | 0.0                    | 1.7 | 0.0 | 1.9 |
| B-H3C1   | 0.8                    | 0.0 | 2.1 | 2.3 | 0.0                    | 0.0 | 1.5 | 1.6 |
| A-H1C1H2 | 0.3                    | 0.0 | 2.3 | 0.0 | 0.0                    | 0.0 | 1.6 | 0.0 |
| A-H1C1H3 | 0.0                    | 2.1 | 0.8 | 0.0 | 0.0                    | 1.5 | 0.0 | 0.0 |
| A-H2C1H3 | 2.3                    | 1.0 | 0.0 | 0.1 | 1.6                    | 0.0 | 0.0 | 0.0 |
| A-sum    | 1.9                    | 2.0 | 2.0 | 2.6 | 1.3                    | 1.3 | 1.3 | 1.9 |
|          | H1                     | H2  | H3  | C1  | H1                     | H2  | H3  | C1  |

Figure S7. Methyl radical importance matrices for  $A_{iso}$  using alternative  $\lambda$  values.

|               | $\lambda = 0.025$                      |     |     |     |     |     |     | $\lambda = 0.100$                      |     |     |     |     |     |     |
|---------------|----------------------------------------|-----|-----|-----|-----|-----|-----|----------------------------------------|-----|-----|-----|-----|-----|-----|
|               | CH <sub>3</sub> CH <sub>2</sub> , Aiso |     |     |     |     |     |     | CH <sub>3</sub> CH <sub>2</sub> , Aiso |     |     |     |     |     |     |
| B-C2C1        | 0.8                                    | 0.1 | 2.1 | 2.1 | 2.2 | 2.4 | 1.6 | 0.0                                    | 0.0 | 1.6 | 1.8 | 1.8 | 1.4 | 1.2 |
| B-H1C1        | 1.3                                    | 0.4 | 0.0 | 0.0 | 0.0 | 2.4 | 0.4 | 0.8                                    | 0.0 | 0.0 | 0.0 | 0.0 | 1.4 | 0.0 |
| B-H2C1        | 0.0                                    | 1.5 | 0.0 | 0.0 | 0.1 | 2.1 | 0.0 | 0.0                                    | 1.1 | 0.0 | 0.1 | 0.0 | 1.3 | 0.0 |
| B-H3C2        | 0.0                                    | 0.0 | 0.7 | 0.0 | 0.0 | 0.0 | 1.0 | 0.0                                    | 0.0 | 0.7 | 0.1 | 0.0 | 0.0 | 0.0 |
| B-H4C2        | 0.0                                    | 0.0 | 0.0 | 0.9 | 0.1 | 1.0 | 1.1 | 0.0                                    | 0.0 | 0.0 | 0.7 | 0.0 | 0.0 | 0.0 |
| B-H5C2        | 0.0                                    | 0.0 | 0.7 | 0.9 | 1.1 | 0.7 | 1.3 | 0.0                                    | 0.0 | 0.5 | 0.6 | 1.0 | 0.3 | 0.4 |
| A-C2C1H1      | 2.4                                    | 2.3 | 0.0 | 0.0 | 0.4 | 0.0 | 0.0 | 0.0                                    | 0.0 | 0.1 | 0.3 | 0.4 | 2.0 | 0.0 |
| A-C2C1H2      | 2.3                                    | 2.4 | 0.0 | 0.0 | 0.0 | 0.0 | 0.0 | 0.0                                    | 0.0 | 0.0 | 0.0 | 0.0 | 2.0 | 0.0 |
| A-H1C1H2      | 2.5                                    | 2.4 | 0.8 | 0.0 | 0.8 | 1.0 | 0.5 | 0.0                                    | 0.0 | 0.4 | 0.0 | 0.4 | 2.0 | 0.0 |
| A-C1C2H3      | 0.0                                    | 0.0 | 0.8 | 0.3 | 0.6 | 0.0 | 1.6 | 0.0                                    | 0.0 | 0.5 | 0.6 | 0.5 | 0.5 | 1.1 |
| A-C1C2H4      | 0.0                                    | 0.1 | 1.0 | 0.9 | 1.3 | 0.0 | 1.7 | 0.0                                    | 0.0 | 0.8 | 0.6 | 1.1 | 0.0 | 1.0 |
| A-H3C2H4      | 0.0                                    | 0.0 | 1.4 | 1.0 | 1.6 | 1.3 | 0.0 | 0.0                                    | 0.0 | 1.2 | 0.8 | 1.2 | 0.1 | 0.0 |
| A-C1C2H5      | 0.0                                    | 0.1 | 1.3 | 1.4 | 0.3 | 0.8 | 1.5 | 0.0                                    | 0.0 | 0.9 | 1.1 | 0.3 | 0.1 | 1.1 |
| A-H3C2H5      | 0.0                                    | 0.0 | 2.0 | 1.2 | 1.1 | 1.7 | 0.0 | 0.0                                    | 0.0 | 1.5 | 1.0 | 0.9 | 0.0 | 0.0 |
| A-H4C2H5      | 0.0                                    | 0.0 | 1.1 | 0.9 | 1.2 | 0.0 | 0.0 | 0.0                                    | 0.0 | 0.9 | 1.0 | 1.1 | 0.0 | 0.0 |
| D-H1C1C2H3cos | 0.9                                    | 0.0 | 3.5 | 4.6 | 4.9 | 0.0 | 0.0 | 0.0                                    | 0.0 | 2.7 | 3.4 | 3.5 | 0.1 | 0.0 |
| D-H1C1C2H3sin | 0.0                                    | 0.0 | 5.1 | 4.8 | 4.1 | 0.0 | 0.0 | 0.0                                    | 0.0 | 3.7 | 3.5 | 3.3 | 0.0 | 0.0 |
|               | H1                                     | H2  | H3  | H4  | H5  | C1  | C2  | H1                                     | H2  | H3  | H4  | H5  | C1  | C2  |

Figure S8. Ethyl radical importance matrices for  $A_{iso}$  using alternative  $\lambda$  values.

|               | $\lambda = 0.025$                     |     |     |     |     |     | $\lambda = 0.100$                     |     |     |     |     |     |
|---------------|---------------------------------------|-----|-----|-----|-----|-----|---------------------------------------|-----|-----|-----|-----|-----|
|               | CH <sub>3</sub> O <sub>2</sub> , Aiso |     |     |     |     |     | CH <sub>3</sub> O <sub>2</sub> , Aiso |     |     |     |     |     |
| B-O2O1        | 0.0                                   | 0.0 | 0.0 | 1.2 | 0.5 | 1.6 | 0.0                                   | 0.0 | 0.0 | 0.0 | 0.0 | 0.8 |
| B-C1O1        | 1.7                                   | 1.5 | 1.8 | 0.3 | 0.9 | 0.0 | 1.4                                   | 1.2 | 1.4 | 0.0 | 0.0 | 0.0 |
| B-H1C1        | 0.9                                   | 0.0 | 0.0 | 0.0 | 0.0 | 0.0 | 0.0                                   | 0.0 | 0.0 | 0.0 | 0.0 | 0.0 |
| B-H2C1        | 0.3                                   | 0.8 | 0.0 | 0.0 | 0.0 | 0.0 | 0.0                                   | 0.0 | 0.0 | 0.0 | 0.0 | 0.0 |
| B-H3C1        | 0.0                                   | 0.0 | 0.4 | 0.0 | 0.0 | 0.0 | 0.0                                   | 0.0 | 0.0 | 0.0 | 0.0 | 0.0 |
| A-O2O1C1      | 1.4                                   | 1.2 | 1.5 | 0.0 | 1.7 | 1.2 | 1.2                                   | 0.9 | 1.2 | 0.0 | 1.0 | 0.0 |
| A-O1C1H1      | 0.0                                   | 0.6 | 0.5 | 0.7 | 0.0 | 0.0 | 0.0                                   | 0.0 | 0.0 | 0.0 | 0.0 | 0.0 |
| A-O1C1H2      | 0.0                                   | 0.0 | 0.0 | 0.0 | 0.0 | 0.0 | 0.0                                   | 0.0 | 0.0 | 0.0 | 0.0 | 0.0 |
| A-H1C1H2      | 1.1                                   | 0.4 | 1.1 | 0.0 | 0.0 | 0.0 | 0.7                                   | 0.0 | 0.6 | 0.0 | 0.0 | 0.0 |
| A-O1C1H3      | 0.4                                   | 0.0 | 0.0 | 0.7 | 0.0 | 0.0 | 0.0                                   | 0.0 | 0.0 | 0.0 | 0.0 | 0.0 |
| A-H1C1H3      | 1.3                                   | 0.9 | 0.7 | 0.0 | 0.0 | 0.0 | 1.1                                   | 0.0 | 0.0 | 0.0 | 0.0 | 0.0 |
| A-H2C1H3      | 0.8                                   | 0.6 | 0.4 | 0.0 | 0.0 | 0.0 | 0.1                                   | 0.0 | 0.0 | 0.0 | 0.0 | 0.0 |
| D-O2O1C1H1cos | 3.5                                   | 3.7 | 4.0 | 0.0 | 2.0 | 0.0 | 3.1                                   | 2.7 | 2.9 | 0.0 | 0.0 | 0.0 |
| D-O2O1C1H1sin | 3.0                                   | 2.7 | 2.7 | 0.0 | 0.0 | 0.0 | 1.3                                   | 2.1 | 2.1 | 0.0 | 0.0 | 0.0 |
|               | H1                                    | H2  | H3  | C1  | O1  | O2  | H1                                    | H2  | H3  | C1  | O1  | O2  |

Figure S9. Methyl peroxy radical importance matrices for  $A_{iso}$  using alternative  $\lambda$  values.





$\lambda = 0.025$  $\lambda = 0.100$ 

Tyr, Aiso

Tyr, Aiso

|               |     |     |     |     |     |     |     |     |     |     |     |     |     |     |     |     |     |     |     |     |     |     |     |     |     |     |     |     |     |     |
|---------------|-----|-----|-----|-----|-----|-----|-----|-----|-----|-----|-----|-----|-----|-----|-----|-----|-----|-----|-----|-----|-----|-----|-----|-----|-----|-----|-----|-----|-----|-----|
| B-C1O1        | 0.0 | 0.6 | 0.9 | 0.5 | 0.0 | 0.0 | 0.6 | 1.2 | 0.7 | 0.2 | 1.0 | 1.1 | 1.0 | 0.9 | 1.9 | 0.0 | 0.3 | 0.6 | 0.0 | 0.0 | 0.0 | 0.0 | 1.1 | 0.3 | 0.0 | 0.0 | 0.0 | 0.7 | 0.1 | 1.3 |
| B-C2C1        | 1.0 | 0.9 | 0.0 | 0.7 | 0.0 | 0.0 | 0.6 | 1.1 | 1.6 | 0.7 | 1.2 | 1.1 | 0.8 | 0.6 | 1.7 | 0.9 | 1.1 | 0.0 | 0.0 | 0.0 | 0.0 | 0.0 | 1.0 | 0.0 | 0.0 | 0.0 | 0.0 | 0.0 | 0.0 | 0.6 |
| B-C3C1        | 0.7 | 0.5 | 0.6 | 0.3 | 0.5 | 0.0 | 0.0 | 0.9 | 0.5 | 1.3 | 1.0 | 1.1 | 0.9 | 0.8 | 1.4 | 0.7 | 0.2 | 0.3 | 0.0 | 0.0 | 0.0 | 0.0 | 0.0 | 1.0 | 0.0 | 0.0 | 0.8 | 0.0 | 0.6 |     |
| B-C4C2        | 0.5 | 0.0 | 0.6 | 0.8 | 0.6 | 0.0 | 1.6 | 0.9 | 1.8 | 0.9 | 1.8 | 0.8 | 0.5 | 0.7 | 0.0 | 0.0 | 0.0 | 0.4 | 0.0 | 0.0 | 0.0 | 0.8 | 0.0 | 1.4 | 0.0 | 1.2 | 0.0 | 0.0 | 0.0 |     |
| B-H7C2        | 0.0 | 0.0 | 0.0 | 0.0 | 0.0 | 0.0 | 0.0 | 0.0 | 0.0 | 0.0 | 0.0 | 0.0 | 0.0 | 0.0 | 0.0 | 0.0 | 0.0 | 0.0 | 0.0 | 0.0 | 0.0 | 0.0 | 0.0 | 0.0 | 0.0 | 0.0 | 0.0 | 0.0 | 0.0 |     |
| B-C5C3        | 0.0 | 0.0 | 0.1 | 0.0 | 1.8 | 0.8 | 0.0 | 0.5 | 0.0 | 2.0 | 1.0 | 2.1 | 0.1 | 0.0 | 0.0 | 0.0 | 0.0 | 0.0 | 0.0 | 1.0 | 0.0 | 0.0 | 0.0 | 1.6 | 0.0 | 0.8 | 0.0 | 0.0 | 0.0 |     |
| B-H5C3        | 0.0 | 0.0 | 0.0 | 0.0 | 0.0 | 0.0 | 0.0 | 0.0 | 0.0 | 0.0 | 0.0 | 0.0 | 0.0 | 0.0 | 0.0 | 0.0 | 0.0 | 0.0 | 0.0 | 0.0 | 0.0 | 0.0 | 0.0 | 0.0 | 0.0 | 0.0 | 0.0 | 0.0 | 0.0 |     |
| B-C6C4        | 0.0 | 0.0 | 0.5 | 0.6 | 1.6 | 0.7 | 1.6 | 0.7 | 1.3 | 1.6 | 0.0 | 1.6 | 1.9 | 0.0 | 0.0 | 0.0 | 0.0 | 0.0 | 0.0 | 1.0 | 0.0 | 0.8 | 0.0 | 0.9 | 1.3 | 0.0 | 0.9 | 1.4 | 0.0 | 0.0 |
| B-H4C4        | 0.0 | 0.0 | 0.0 | 0.0 | 0.0 | 0.0 | 0.0 | 0.0 | 0.0 | 0.0 | 0.0 | 0.0 | 0.0 | 0.0 | 0.0 | 0.0 | 0.0 | 0.0 | 0.0 | 0.0 | 0.0 | 0.0 | 0.0 | 0.0 | 0.0 | 0.0 | 0.0 | 0.0 | 0.0 | 0.0 |
| B-C6C5        | 0.0 | 0.9 | 0.1 | 0.9 | 1.8 | 0.3 | 1.2 | 0.7 | 1.8 | 1.7 | 1.4 | 0.0 | 2.0 | 0.0 | 0.0 | 0.0 | 0.5 | 0.0 | 0.0 | 0.9 | 0.0 | 0.7 | 0.0 | 1.4 | 1.4 | 0.8 | 0.0 | 1.4 | 0.0 | 0.0 |
| B-H6C5        | 0.0 | 0.0 | 0.0 | 0.0 | 0.0 | 0.0 | 0.0 | 0.0 | 0.0 | 0.0 | 0.0 | 0.0 | 0.0 | 0.0 | 0.0 | 0.0 | 0.0 | 0.0 | 0.0 | 0.0 | 0.0 | 0.0 | 0.0 | 0.0 | 0.0 | 0.0 | 0.0 | 0.0 | 0.0 | 0.0 |
| B-C7C6        | 1.7 | 2.2 | 1.8 | 0.0 | 0.0 | 0.0 | 0.0 | 0.0 | 0.0 | 0.0 | 0.0 | 0.0 | 1.4 | 1.2 | 0.0 | 1.3 | 1.6 | 1.5 | 0.0 | 0.0 | 0.0 | 0.0 | 0.0 | 0.0 | 0.0 | 0.0 | 0.8 | 0.5 | 0.0 | 0.0 |
| B-H1C7        | 0.0 | 0.0 | 0.0 | 0.0 | 0.0 | 0.0 | 0.0 | 0.0 | 0.0 | 0.0 | 0.0 | 0.0 | 0.0 | 0.0 | 0.0 | 0.0 | 0.0 | 0.0 | 0.0 | 0.0 | 0.0 | 0.0 | 0.0 | 0.0 | 0.0 | 0.0 | 0.0 | 0.0 | 0.0 | 0.0 |
| B-H2C7        | 0.4 | 0.0 | 0.0 | 0.0 | 0.0 | 0.0 | 0.0 | 0.0 | 0.0 | 0.0 | 0.0 | 0.0 | 0.0 | 0.0 | 0.0 | 0.0 | 0.0 | 0.0 | 0.0 | 0.0 | 0.0 | 0.0 | 0.0 | 0.0 | 0.0 | 0.0 | 0.0 | 0.0 | 0.0 | 0.0 |
| B-H3C7        | 0.0 | 0.0 | 0.0 | 0.0 | 0.0 | 0.0 | 0.0 | 0.0 | 0.0 | 0.0 | 0.0 | 0.0 | 0.0 | 0.0 | 0.0 | 0.0 | 0.0 | 0.0 | 0.0 | 0.0 | 0.0 | 0.0 | 0.0 | 0.0 | 0.0 | 0.0 | 0.0 | 0.0 | 0.0 | 0.0 |
| A-O1C1C2      | 0.0 | 0.6 | 0.8 | 0.0 | 0.0 | 0.0 | 0.0 | 0.8 | 0.0 | 0.2 | 0.0 | 0.0 | 0.9 | 0.0 | 0.0 | 0.3 | 0.3 | 0.7 | 0.0 | 0.0 | 0.0 | 0.0 | 0.0 | 0.0 | 0.0 | 0.0 | 0.0 | 0.0 | 0.0 | 0.0 |
| A-O1C1C3      | 0.0 | 1.0 | 0.6 | 0.8 | 0.9 | 0.8 | 0.8 | 0.5 | 0.7 | 0.7 | 0.6 | 0.9 | 0.8 | 0.4 | 0.8 | 0.0 | 0.7 | 0.5 | 0.0 | 0.0 | 0.0 | 0.0 | 0.1 | 0.0 | 0.0 | 0.2 | 0.0 | 0.6 | 0.0 | 0.0 |
| A-C2C1C3      | 0.0 | 0.0 | 0.0 | 0.0 | 0.0 | 0.0 | 0.0 | 1.5 | 0.0 | 0.0 | 0.0 | 0.0 | 0.8 | 0.0 | 0.0 | 0.0 | 0.0 | 0.0 | 0.0 | 0.0 | 0.0 | 0.0 | 0.0 | 0.0 | 0.0 | 0.0 | 0.0 | 0.0 | 0.0 | 0.0 |
| A-C1C2C4      | 0.0 | 0.0 | 0.0 | 0.0 | 1.5 | 0.0 | 0.0 | 0.0 | 0.0 | 0.7 | 0.0 | 0.5 | 0.2 | 0.0 | 0.0 | 0.0 | 0.0 | 0.0 | 0.0 | 0.0 | 0.0 | 0.0 | 0.0 | 0.4 | 0.0 | 0.0 | 0.0 | 0.0 | 0.0 | 0.0 |
| A-C1C2H7      | 0.0 | 0.0 | 0.0 | 0.0 | 0.0 | 0.0 | 0.0 | 0.0 | 0.0 | 0.1 | 0.0 | 0.0 | 0.1 | 0.0 | 0.0 | 0.0 | 0.0 | 0.0 | 0.0 | 0.0 | 0.0 | 0.0 | 0.0 | 0.0 | 0.0 | 0.0 | 0.0 | 0.0 | 0.0 | 0.0 |
| A-C4C2H7      | 0.0 | 0.0 | 0.0 | 0.0 | 0.0 | 0.0 | 0.0 | 0.0 | 0.0 | 0.0 | 0.0 | 0.0 | 0.0 | 0.0 | 0.0 | 0.0 | 0.0 | 0.0 | 0.0 | 0.0 | 0.0 | 0.0 | 0.0 | 0.0 | 0.0 | 0.0 | 0.0 | 0.0 | 0.0 | 0.0 |
| A-C1C3C5      | 0.0 | 0.0 | 0.0 | 0.0 | 0.0 | 0.0 | 1.1 | 0.2 | 0.8 | 0.2 | 0.0 | 0.0 | 0.2 | 0.0 | 0.0 | 0.0 | 0.0 | 0.0 | 0.0 | 0.0 | 0.0 | 0.0 | 0.0 | 0.0 | 0.0 | 0.0 | 0.0 | 0.0 | 0.0 | 0.0 |
| A-C1C3H5      | 0.1 | 0.0 | 0.1 | 0.0 | 0.0 | 0.0 | 0.0 | 0.0 | 0.0 | 0.2 | 0.0 | 0.0 | 0.2 | 0.0 | 0.0 | 0.0 | 0.0 | 0.0 | 0.0 | 0.0 | 0.0 | 0.0 | 0.0 | 0.0 | 0.0 | 0.0 | 0.0 | 0.0 | 0.0 | 0.0 |
| A-C5C3H5      | 0.0 | 0.0 | 0.0 | 0.0 | 0.0 | 0.0 | 0.0 | 0.0 | 0.3 | 0.1 | 0.0 | 0.0 | 0.0 | 0.0 | 0.0 | 0.0 | 0.0 | 0.0 | 0.0 | 0.0 | 0.0 | 0.0 | 0.0 | 0.0 | 0.0 | 0.0 | 0.0 | 0.0 | 0.0 | 0.0 |
| A-C2C4C6      | 0.0 | 0.0 | 0.0 | 0.0 | 0.0 | 0.0 | 0.0 | 0.0 | 0.8 | 1.0 | 0.0 | 0.0 | 0.0 | 0.0 | 0.0 | 0.0 | 0.0 | 0.0 | 0.0 | 0.0 | 0.0 | 0.0 | 0.0 | 0.0 | 0.0 | 0.0 | 0.0 | 0.0 | 0.0 | 0.0 |
| A-C2C4H4      | 1.0 | 0.1 | 0.4 | 0.0 | 0.7 | 0.0 | 0.0 | 0.0 | 0.0 | 0.1 | 0.0 | 0.0 | 0.1 | 0.0 | 0.0 | 0.0 | 0.0 | 0.0 | 0.0 | 0.0 | 0.0 | 0.0 | 0.0 | 0.0 | 0.0 | 0.0 | 0.0 | 0.0 | 0.0 | 0.0 |
| A-C6C4H4      | 0.0 | 0.0 | 0.0 | 0.0 | 0.0 | 0.0 | 0.0 | 0.6 | 0.0 | 0.0 | 0.0 | 0.0 | 0.1 | 0.0 | 0.0 | 0.0 | 0.0 | 0.0 | 0.0 | 0.0 | 0.0 | 0.0 | 0.0 | 0.0 | 0.0 | 0.0 | 0.0 | 0.0 | 0.0 | 0.0 |
| A-C3C5C6      | 0.1 | 0.0 | 0.0 | 1.0 | 0.5 | 0.0 | 0.0 | 0.4 | 0.9 | 1.0 | 0.0 | 0.0 | 0.6 | 0.0 | 0.0 | 0.0 | 0.0 | 0.0 | 0.0 | 0.0 | 0.0 | 0.0 | 0.7 | 0.0 | 0.0 | 0.0 | 0.0 | 0.0 | 0.0 | 0.0 |
| A-C3C5H6      | 0.2 | 0.0 | 0.1 | 0.0 | 0.0 | 0.0 | 0.0 | 0.3 | 0.1 | 0.0 | 0.0 | 0.0 | 0.0 | 0.5 | 0.0 | 0.0 | 0.0 | 0.1 | 0.0 | 0.0 | 0.0 | 0.0 | 0.0 | 0.0 | 0.0 | 0.0 | 0.0 | 0.0 | 0.0 | 0.0 |
| A-C6C5H6      | 0.0 | 0.0 | 0.1 | 0.0 | 0.0 | 0.0 | 0.0 | 0.0 | 0.0 | 0.1 | 0.0 | 0.0 | 0.2 | 0.0 | 0.0 | 0.0 | 0.0 | 0.0 | 0.0 | 0.0 | 0.0 | 0.0 | 0.0 | 0.0 | 0.0 | 0.0 | 0.0 | 0.0 | 0.0 | 0.0 |
| A-C4C6C5      | 0.8 | 0.1 | 0.8 | 0.0 | 0.1 | 0.0 | 0.5 | 0.7 | 0.6 | 0.3 | 1.2 | 1.3 | 0.7 | 0.0 | 0.0 | 0.0 | 0.0 | 0.4 | 0.0 | 0.0 | 0.0 | 0.0 | 0.0 | 0.0 | 0.0 | 0.0 | 0.0 | 0.0 | 0.0 | 0.0 |
| A-C4C6C7      | 0.1 | 0.5 | 0.3 | 0.6 | 1.2 | 0.4 | 0.6 | 0.5 | 0.6 | 0.9 | 1.2 | 0.4 | 0.6 | 0.4 | 0.4 | 0.8 | 0.0 | 0.0 | 0.0 | 0.5 | 0.0 | 0.5 | 0.4 | 0.0 | 0.7 | 0.7 | 0.0 | 0.6 | 0.0 | 0.0 |
| A-C5C6C7      | 0.9 | 1.2 | 0.9 | 0.7 | 0.6 | 0.7 | 0.5 | 0.9 | 1.0 | 0.7 | 0.0 | 1.0 | 0.8 | 0.7 | 0.9 | 0.7 | 1.2 | 0.6 | 0.0 | 0.0 | 0.0 | 0.6 | 0.4 | 0.6 | 0.2 | 0.0 | 0.7 | 0.7 | 0.2 | 0.6 |
| A-C6C7H1      | 1.4 | 0.8 | 1.0 | 0.0 | 0.0 | 0.0 | 0.0 | 0.0 | 0.0 | 0.1 | 0.0 | 0.0 | 0.0 | 1.1 | 0.0 | 0.8 | 0.8 | 0.6 | 0.0 | 0.0 | 0.0 | 0.0 | 0.0 | 0.0 | 0.0 | 0.0 | 0.0 | 0.0 | 0.0 | 0.0 |
| A-C6C7H2      | 1.2 | 0.7 | 1.3 | 0.0 | 0.0 | 0.0 | 0.0 | 0.0 | 0.0 | 0.3 | 0.0 | 0.0 | 0.8 | 0.5 | 0.0 | 1.0 | 0.6 | 1.0 | 0.0 | 0.0 | 0.0 | 0.0 | 0.0 | 0.0 | 0.0 | 0.0 | 0.0 | 0.0 | 0.0 | 0.0 |
| A-H1C7H2      | 1.1 | 1.0 | 1.2 | 0.0 | 0.0 | 0.0 | 0.0 | 0.0 | 0.0 | 0.0 | 0.0 | 0.0 | 0.0 | 0.9 | 0.0 | 1.1 | 0.3 | 0.8 | 0.0 | 0.0 | 0.0 | 0.0 | 0.0 | 0.0 | 0.0 | 0.0 | 0.0 | 0.0 | 0.0 | 0.0 |
| A-C6C7H3      | 0.9 | 1.1 | 0.8 | 0.0 | 0.0 | 0.0 | 0.0 | 0.0 | 0.1 | 0.1 | 0.0 | 0.0 | 1.0 | 1.0 | 0.0 | 0.8 | 1.3 | 0.5 | 0.0 | 0.0 | 0.0 | 0.0 | 0.0 | 0.0 | 0.0 | 0.0 | 0.0 | 0.0 | 0.0 | 0.0 |
| A-H1C7H3      | 0.9 | 1.1 | 0.9 | 0.0 | 0.8 | 0.0 | 0.0 | 0.1 | 0.0 | 0.3 | 0.0 | 0.0 | 0.0 | 0.1 | 0.0 | 0.6 | 0.7 | 0.7 | 0.0 | 0.0 | 0.0 | 0.0 | 0.0 | 0.0 | 0.0 | 0.0 | 0.0 | 0.0 | 0.0 | 0.0 |
| A-H2C7H3      | 0.1 | 0.2 | 0.0 | 0.0 | 0.0 | 0.0 | 0.0 | 0.0 | 0.0 | 0.0 | 0.0 | 0.0 | 0.0 | 0.0 | 0.0 | 0.0 | 0.0 | 0.0 | 0.0 | 0.0 | 0.0 | 0.0 | 0.0 | 0.0 | 0.0 | 0.0 | 0.0 | 0.0 | 0.0 | 0.0 |
| D-O1C1C2C4cos | 0.8 | 0.0 | 0.8 | 0.5 | 0.2 | 0.5 | 0.5 | 0.8 | 0.1 | 0.7 | 1.1 | 0.5 | 0.6 | 0.4 | 0.8 | 0.1 | 0.1 | 0.4 | 0.0 | 0.0 | 0.0 | 0.3 | 0.5 | 0.4 | 0.3 | 0.5 | 0.4 | 0.7 | 0.0 | 0.0 |
| D-O1C1C2C4sin | 0.0 | 1.3 | 1.0 | 0.0 | 0.1 | 0.0 | 0.0 | 0.7 | 0.1 | 0.4 | 0.0 | 0.0 | 1.3 | 0.6 | 0.0 | 1.0 | 1.3 | 0.8 | 0.0 | 0.0 | 0.0 | 0.2 | 0.0 | 0.0 | 0.0 | 0.1 | 0.6 | 0.0 | 0.0 |     |
| D-O1C1C3C5cos | 0.8 | 0.5 | 0.2 | 0.4 | 0.3 | 0.5 | 0.6 | 0.6 | 0.8 | 0.6 | 0.8 | 0.6 | 0.3 | 0.4 | 0.4 | 0.8 | 0.4 | 0.0 | 0.0 | 0.3 | 0.2 | 0.3 | 0.5 | 0.4 | 0.7 | 0.5 | 0.4 | 0.4 | 0.5 | 0.5 |
| D-O1C1C3C5sin | 0.9 | 0.1 | 0.6 | 0.7 | 0.8 | 0.5 | 1.0 | 0.5 | 0.9 | 0.7 | 0.2 | 0.6 | 0.4 | 0.4 | 0.5 | 0.1 | 0.0 | 0.5 | 0.0 | 0.0 | 0.0 | 0.0 | 0.0 | 0.0 | 0.0 | 0.0 | 0.0 | 0.0 | 0.0 | 0.0 |
| D-C1C2C4C6cos | 0.0 | 0.0 | 0.5 | 0.0 | 0.0 | 0.0 | 0.5 | 0.0 | 0.8 | 0.0 | 0.0 | 0.0 | 0.0 | 0.0 | 0.0 | 0.0 | 0.0 | 0.0 | 0.0 | 0.0 | 0.0 | 0.0 | 0.0 | 0.0 | 0.0 | 0.0 | 0.0 | 0.0 | 0.0 | 0.0 |
| D-C1C2C4C6sin | 1.1 | 0.1 | 0.9 | 0.0 | 0.0 | 0.0 | 0.0 | 0.5 | 0.2 | 0.0 | 0.0 | 0.0 | 0.1 | 0.0 | 0.0 | 0.4 | 0.0 | 0.7 | 0.0 | 0.0 | 0.0 | 0.0 | 0.0 | 0.0 | 0.0 | 0.0 | 0.0 | 0.0 | 0.0 | 0.0 |
| D-C1C3C5C6cos | 0.3 | 0.3 | 0.0 | 0.0 | 0.0 | 0.0 | 0.0 | 0.0 | 0.0 | 0.1 | 0.0 | 0.0 | 0.3 | 0.0 | 0.0 | 0.0 | 0.0 | 0.0 | 0.0 | 0.0 | 0.0 | 0.0 | 0.0 | 0.0 | 0.0 | 0.0 | 0.0 | 0.0 | 0.0 | 0.0 |
| D-C1C3C5C6sin | 0.3 | 0.3 | 0.0 | 0.0 | 0.0 | 0.0 | 0.0 | 0.8 | 0.0 | 0.1 | 0.0 | 0.0 | 0.3 | 0.0 | 0.0 | 0.0 | 0.0 | 0.0 | 0.0 | 0.0 | 0.0 | 0.0 | 0.0 | 0.0 | 0.0 | 0.0 | 0.0 | 0.0 | 0.0 | 0.0 |
| D-C2C4C6C5cos | 0.2 | 0.0 | 0.0 | 0.7 | 0.0 | 0.6 | 0.0 | 0.2 | 0.9 | 0.1 | 0.0 | 0.0 | 0.8 | 0.0 | 0.0 | 0.0 | 0.0 | 0.0 | 0.3 | 0.3 | 0.0 | 0.6 | 0.0 | 0.0 | 0.0 |     |     |     |     |     |



## (F) Example ORCA input files

**Code S1.** ORCA input file of the methyl peroxy radical for geometry optimization.

```
!B3LYP def2-TZVP OPT
!PAL4

* xyz 0 2
C      4.21793      3.22013      -1.25690
H      4.55418      3.89270      -2.01813
H      4.84511      2.35331      -1.24438
H      4.26345      3.70708      -0.30521
O      3.20026      2.92490      -1.46162
O      2.75217      2.15016      -0.83972
*
```

**Code S2.** ORCA input file of the methyl peroxy radical for molecular dynamics.

```
! B3LYP def2-TZVP Autoaux
! MD
%pal nprocs 8 end

%md
  randomize          # fully randomize pseudo-random numbers
  initvel 900_K      # initializing velocities
  timestep 0.5_fs    # simulation time step: timestep=sqrt(m)*0.5 fs
  thermostat NHC 900_K timecon 20.0_fs
  dump position stride 1 filename "trajectory.xyz" # saving
  run 40000          # steps
end

* xyz 0 2
C      4.34381726168830      3.27186822197136      -1.25018445100959
H      4.65015015611072      3.95799780083515      -2.03769095068005
H      4.96314893816840      2.37658536558411      -1.24350101227158
H      4.36290392119334      3.76122436788255      -0.27697283385964
O      2.98148099158113      2.90340472042924      -1.56806035648166
O      2.53159873125808      1.97719952329757      -0.74955039569748
*
```

**Code S3.** ORCA input file of the methyl peroxy radical for hyperfine tensor calculation.

```
!B3LYP EPR-III Autoaux
!PAL4

* xyz 0 2
C      4.3438172811      3.2718682366      -1.2501844566
H      4.6501501769      3.9579978186      -2.0376909598
H      4.9631489604      2.3765853762      -1.2435010178
H      4.3629039407      3.7612243847      -0.2769728351
O      2.9814810049      2.9034047334      -1.5680603635
O      2.5315987426      1.9771995322      -0.7495503991
*

%EPRNMR
  GTENSOR TRUE
  NUCLEI = ALL H {AISO, ADIP}
  NUCLEI = ALL C {AISO, ADIP}
  NUCLEI = ALL O {AISO, ADIP}
END
```
